# Supplementary material
Source: publisher figshare collection journal article supplement (https://gsajournals.figshare.com/articles/dataset/_/16973293)
Supplement: Supplementary file 1 [file 1]

# Supplementary Figures

2022-03-18

Table S1: Spatial model summaries for Est describing effective and nominal dimensions, their ratio, and parameter type across all traits

|                  | TY                  |                   |       |                   | TN                  |                   |       |                   | TV                  |                   |       |                   |
|------------------|---------------------|-------------------|-------|-------------------|---------------------|-------------------|-------|-------------------|---------------------|-------------------|-------|-------------------|
|                  | Effective Dimension | Nominal Dimension | Ratio | Type <sup>a</sup> | Effective Dimension | Nominal Dimension | Ratio | Type <sup>a</sup> | Effective Dimension | Nominal Dimension | Ratio | Type <sup>a</sup> |
| Intercept        | 1.0                 | 1                 | 1.00  | F                 | 1.0                 | 1                 | 1.00  | F                 | 1.0                 | 1                 | 1.00  | F                 |
| Control          | 1.0                 | 1                 | 1.00  | F                 | 1.0                 | 1                 | 1.00  | F                 | 1.0                 | 1                 | 1.00  | F                 |
| Genotype         | 505.5               | 604               | 0.84  | R                 | 483.0               | 604               | 0.80  | R                 | 539.6               | 604               | 0.89  | R                 |
| R-Row            | 12.2                | 18                | 0.68  | R                 | 12.2                | 18                | 0.68  | R                 | 8.5                 | 18                | 0.47  | R                 |
| R-Column         | 0.0                 | 63                | 0.00  | R                 | 0.0                 | 63                | 0.00  | R                 | 0.0                 | 63                | 0.00  | R                 |
| Column           | 1.0                 | 1                 | 1.00  | S                 | 1.0                 | 1                 | 1.00  | S                 | 1.0                 | 1                 | 1.00  | S                 |
| Row              | 1.0                 | 1                 | 1.00  | S                 | 1.0                 | 1                 | 1.00  | S                 | 1.0                 | 1                 | 1.00  | S                 |
| Column:Row       | 1.0                 | 1                 | 1.00  | S                 | 1.0                 | 1                 | 1.00  | S                 | 1.0                 | 1                 | 1.00  | S                 |
| f(Column)        | 2.9                 | 21                | 0.14  | S                 | 3.4                 | 21                | 0.16  | S                 | 0.9                 | 21                | 0.04  | S                 |
| f(Row)           | 0.0                 | 66                | 0.00  | S                 | 0.0                 | 66                | 0.00  | S                 | 0.0                 | 66                | 0.00  | S                 |
| f(Column):Row    | 3.8                 | 21                | 0.18  | S                 | 0.0                 | 21                | 0.00  | S                 | 3.0                 | 21                | 0.14  | S                 |
| Column:f(Row)    | 0.7                 | 66                | 0.01  | S                 | 0.6                 | 66                | 0.01  | S                 | 0.0                 | 66                | 0.00  | S                 |
| f(Column):f(Row) | 16.5                | 1386              | 0.01  | S                 | 11.7                | 1386              | 0.01  | S                 | 2.9                 | 1386              | 0.00  | S                 |
| Total            | 546.7               | 2250              | 0.24  |                   | 515.9               | 2250              | 0.23  |                   | 559.8               | 2250              | 0.25  |                   |
| Residual         | 635.3               |                   |       |                   | 666.1               |                   |       |                   | 622.2               |                   |       |                   |

<sup>a</sup> F = Fixed, R = Random, S = Semi-parametric

Table S2: Spatial model summaries for Heelsum describing effective and nominal dimensions, their ratio, and parameter type across all traits

|                  | TY                  |                   |       |                   | TN                  |                   |       |                   | TV                  |                   |       |                   |
|------------------|---------------------|-------------------|-------|-------------------|---------------------|-------------------|-------|-------------------|---------------------|-------------------|-------|-------------------|
|                  | Effective Dimension | Nominal Dimension | Ratio | Type <sup>a</sup> | Effective Dimension | Nominal Dimension | Ratio | Type <sup>a</sup> | Effective Dimension | Nominal Dimension | Ratio | Type <sup>a</sup> |
| Intercept        | 1.0                 | 1                 | 1.00  | F                 | 1.0                 | 1                 | 1.00  | F                 | 1.0                 | 1                 | 1.00  | F                 |
| Control          | 1.0                 | 1                 | 1.00  | F                 | 1.0                 | 1                 | 1.00  | F                 | 1.0                 | 1                 | 1.00  | F                 |
| Genotype         | 634.0               | 718               | 0.88  | R                 | 585.6               | 718               | 0.82  | R                 | 643.0               | 718               | 0.90  | R                 |
| R-Row            | 0.0                 | 18                | 0.00  | R                 | 0.0                 | 18                | 0.00  | R                 | 0.0                 | 18                | 0.00  | R                 |
| R-Column         | 37.3                | 83                | 0.45  | R                 | 39.7                | 83                | 0.48  | R                 | 45.3                | 83                | 0.55  | R                 |
| Column           | 1.0                 | 1                 | 1.00  | S                 | 1.0                 | 1                 | 1.00  | S                 | 1.0                 | 1                 | 1.00  | S                 |
| Row              | 1.0                 | 1                 | 1.00  | S                 | 1.0                 | 1                 | 1.00  | S                 | 1.0                 | 1                 | 1.00  | S                 |
| Column:Row       | 1.0                 | 1                 | 1.00  | S                 | 1.0                 | 1                 | 1.00  | S                 | 1.0                 | 1                 | 1.00  | S                 |
| f(Column)        | 4.5                 | 21                | 0.21  | S                 | 3.2                 | 21                | 0.15  | S                 | 2.2                 | 21                | 0.10  | S                 |
| f(Row)           | 0.0                 | 86                | 0.00  | S                 | 0.4                 | 86                | 0.01  | S                 | 0.9                 | 86                | 0.01  | S                 |
| f(Column):Row    | 0.0                 | 21                | 0.00  | S                 | 0.2                 | 21                | 0.01  | S                 | 0.0                 | 21                | 0.00  | S                 |
| Column:f(Row)    | 0.0                 | 86                | 0.00  | S                 | 0.3                 | 86                | 0.00  | S                 | 0.0                 | 86                | 0.00  | S                 |
| f(Column):f(Row) | 18.3                | 1806              | 0.01  | S                 | 13.3                | 1806              | 0.01  | S                 | 6.4                 | 1806              | 0.00  | S                 |
| Total            | 699.2               | 2844              | 0.25  |                   | 647.6               | 2844              | 0.23  |                   | 702.8               | 2844              | 0.25  |                   |
| Residual         | 771.8               |                   |       |                   | 823.4               |                   |       |                   | 731.2               |                   |       |                   |

<sup>a</sup> F = Fixed, R = Random, S = Semi-parametric

Table S3: Variance components from hybrid model with standard errors included in parantheticals for total tuber number (TN), average tuber volume (TV), and total tuber yield (TY). Covariances between traits excluded here for brevity.

| Component              | TN               | TV           | TY           |
|------------------------|------------------|--------------|--------------|
| $\sigma_G^2$           | 1432.98 (131.33) | 27.29 (2.04) | 25.60 (2.42) |
| $\sigma_{GE}^2$        | 589.55 (73.30)   | 5.27 (0.60)  | 15.06 (1.41) |
| $\sigma_\varepsilon^2$ | 923.07 (43.72)   | 6.66 (0.32)  | 11.84 (0.56) |

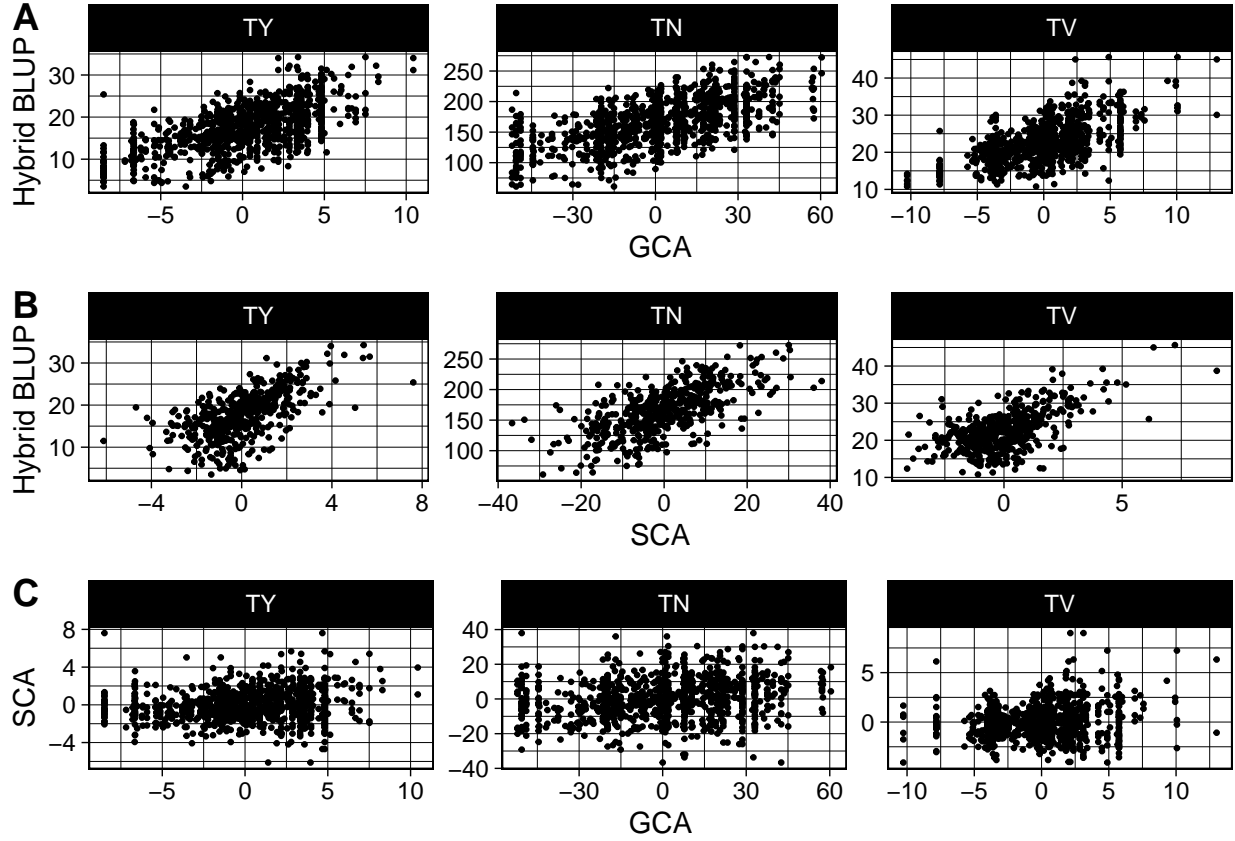

Figure S1: Scatterplots for each tuber trait with (A) hybrid BLUP's plotted with GCA's, (B) SCA's, and (C) GCA's on SCA's

Table S4: Ratio between the sample quantiles of GCA and SCA effects for total yield (TY), tuber number (TN), and average tuber volume (TV). Included are the 0, 10th, 25th, 40th, 60th, 75th, 90th and 100th percentiles along with an average ratio of quantiles in  $\bar{q}$ .

| Trait | 0%  | 10% | 25% | 40% | 60% | 75% | 90% | 100% | $\bar{q}$ |
|-------|-----|-----|-----|-----|-----|-----|-----|------|-----------|
| TN    | 1.4 | 2.0 | 2.4 | 2.4 | 2.5 | 2.1 | 2.2 | 1.6  | 2.1       |
| TV    | 2.5 | 2.0 | 1.7 | 1.6 | 1.8 | 2.1 | 1.7 | 1.4  | 1.9       |
| TY    | 1.4 | 2.4 | 2.0 | 2.4 | 2.3 | 2.5 | 2.0 | 1.4  | 2.0       |
